# Supplementary material
Source: publisher figshare collection journal article supplement (https://gsapubs.figshare.com/ndownloader/files/22759439)
Supplement: Supplementary file 1 [file 22759439]

**Table DR1.** Coeval late Paleoproterozoic and Mesoproterozoic palaeomagnetic poles from Baltica (Fennoscandia) and Laurentia.

| Rock name           | Age       | Plat  | Plong | A <sub>95</sub> | Reference                                                    |
|---------------------|-----------|-------|-------|-----------------|--------------------------------------------------------------|
|                     | (Ma)      | (°N)  | (°E)  | (°)             |                                                              |
| <i>Fennoscandia</i> |           |       |       |                 |                                                              |
| Shoksha Formation   | 1790-1770 | 39.7  | 221.1 | 4.0             | Pisarevsky and Sokolov (2001)                                |
| Mean for Baltica    | ~1460     | 15.0  | 181.0 | 11.0            | Salminen and Pesonen (2007)                                  |
| Mean for Baltica    | ~1265     | 4.0   | 158.0 | 4.0             | Pesonen et al. (2003)                                        |
| Salla Dyke          | 1122±7    | 71.0  | 113.0 | 8.1             | Salminen et al. (2009)                                       |
| Laanila Dolerite    | 1045±50   | -2.0  | 212.0 | 15.0            | Mertanen et al.(1996)                                        |
| <i>Laurentia</i>    |           |       |       |                 |                                                              |
| Mean for Laurentia  | 1760-1740 | 20.8  | 265.5 | 5.2             | Irving et al. (2004)                                         |
| St. Francois Mts.   | 1476±16   | -13.2 | 219.0 | 6.1             | Meert and Stuckey (2002)                                     |
| Michikamau Intr.    | 1460±5    | -1.5  | 217.5 | 4.7             | Emslie et. al. (1976)                                        |
| Harp Lake Complex   | 1450±5    | 1.6   | 206.3 | 4.3             | Irving et al. (1977)                                         |
| MacKenzie dykes     | 1267+7/-3 | 4.0   | 190.0 | 5.0             | Buchan and Halls (1990),<br>LeCheminant and<br>Heaman (1989) |
| Freda Sandstone     | 1050±30   | 2.0   | 179.0 | 4.0             | Henry et al. (1977),<br>Wingate et al.(2002)                 |
| Nonesuch Shale      | 1050±30   | 8.0   | 178.0 | 4.0             | Henry et al. (1977),<br>Wingate et al.(2002)                 |

Plat, Plong = latitude and longitude of the paleomagnetic pole; A<sub>95</sub> = semi-angle of the 95% cone of confidence.

## References

- Buchan, K.L., Halls, H.C., 1990. Paleomagnetism of Proterozoic mafic dyke swarms of the Canadian Shield. In: Parker, A.J., Rickwood, P.C., Tucker, D.H. (Eds.), *Mafic Dykes and Emplacement Mechanism*. A.A. Balkema, Rotterdam, pp. 209-230.
- Emslie, R.F., Irving, E., Park, J.K., 1976. Further paleomagnetic results from the Michikamau intrusion, Labrador. *Can. J. Earth Sci.* 13, 1052-1057.
- Henry, S.G., Mauk, F.J., Van der Voo, R., 1977. Paleomagnetism of the upper Keweenaw sediments: the Nonesuch Shale and Freda Sandstone. *Canadian Journal of Earth Sciences*, 14, 1128-1138.

- Irving, E., Baker, J., Hamilton, M., Wynne, P.J., 2004. Early Proterozoic geomagnetic field in western Laurentia: implications for paleolatitudes, local rotations and stratigraphy. *Precambrian Research* 129, 251-270.
- LeCheminant, A.N., Heaman, L.M., 1989. MacKenzie igneous events, Canada: middle Proterozoic hotspot magmatism associated with ocean opening. *Earth and Planetary Science Letters* 96, 38-48.
- Meert, J.G., Stuckey, W., 2002. Revisiting the paleomagnetism of the 1.476 Ga St.Franconis Mountains igneous province, Missouri. *Tectonics* 21(2), 1007, doi:10.1029/2000TC001265.
- Mertanen, S., Pesonen, L.J., Huhma, H., 1996. Palaeomagnetism and Sm-Nd ages of the Neoproterozoic diabase dykes in Laanila and Kautokeino, northern Fennoscandia. In: Brewer, T.S. (ed), *Precambrian Crustal Evolution in the North Atlantic region*, Geological Society of London Special Publication, 112, 331-358.
- Pesonen, L.J., Elming, S.-A., Mertanen, S., Pisarevsky, S.A., D'Agrella-Filho, M.S., Meert, J., Schmidt, P.W., Abrahamsen, N., Bylund, G., 2003. Palaeomagnetic configuration of continents during the Proterozoic. *Tectonophysics* 375, 289-324.
- Pisarevsky, S.A., Sokolov, S.J., 2001. The magnetostratigraphy and a 1780 Ma palaeomagnetic pole from the red sandstones of the Vazhinka River section, Karelia, Russia. *Geophysics Journal International* 146, 531-538.
- Salminen, J., Pesonen, L.J., 2007. Paleomagnetic and rock magnetic study of the Mesoproterozoic sill, Valaam island, Russian Karelia. *Precambrian Research* 159, 212-230.
- Salminen, J., Pesonen, L.J., Mertanen, S., Vuollo, J., Airo, M.-L., in press. Palaeomagnetism of the Salla Diabase Dyke, northeastern Finland and its implication for the Baltica-Laurentia entity during the Mesoproterozoic. In: Reddy, S.M., Mazumder, R., Evans, D.A.D. & Collins, A.S. (eds) *Palaeoproterozoic Supercontinents and Global Evolution*. The Geological Society, London, Special Publications, 323, 199-217.
- Wingate, M.T.D., Pisarevsky, S.A., Evans, D.A.D., 2002. Rodinia connections between Australia and Laurentia: no SWEAT, no AUSWUS? *Terra Nova*, 14, 121-128.

Figure DR1.

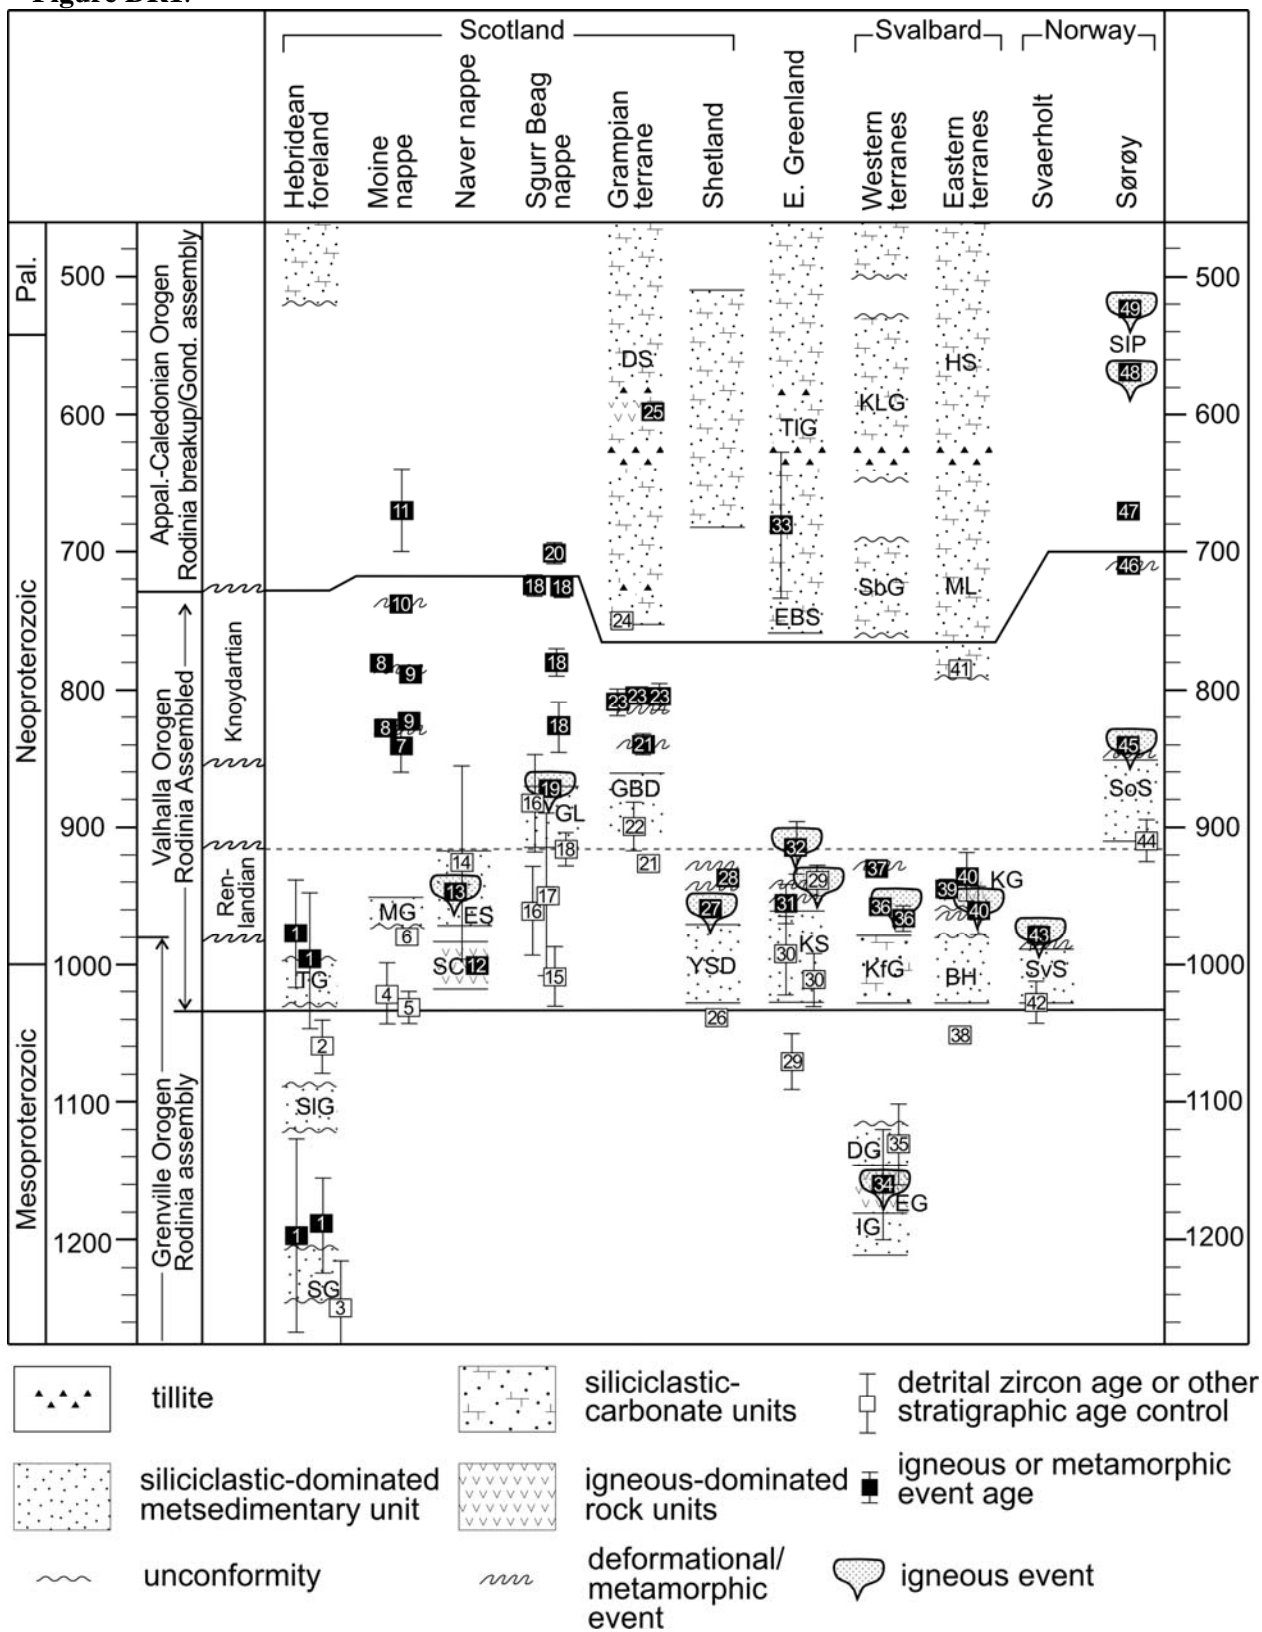

**Figure DR1.** Age range of principal late Mesoproterozoic to Paleozoic metasedimentary units and of tectonothermal events within regions affected by the Valhalla Orogen, from the North Atlantic borderlands. Numbers on data points refer to the following sources: **1** - Turnbull et al. (1996) determined a maximum age for the Stoer Group by a Rb–Sr age of  $1187 \pm 35$  Ma on chloritized biotite from a gneissic boulder and a Pb–Pb age of  $1199 \pm 70$  Ma on a thin stromatolitic bed low in the group interpreted as a depositional age and maximum ages for the Torridon Group of  $994 \pm 48$  and  $977 \pm 39$  based on Rb/Sr analysis of shales; **2** - Rainbird et al. (2001), U–Pb zircon age of  $1060 \pm 18$  Ma for youngest detrital grain in Torridon Group; **3** - Kinnaird et al. (2007), U–Pb zircon age of  $1247 \pm 34$  Ma for youngest detrital grain in Sleat Group, the age of which is also constrained by its unconformable relationship with the overlying Torridon Group and inferred younger age than the Stoer Group; **4** - Kirkland et al. (2008), U–Pb zircon age of  $1022 \pm 24$  Ma for youngest detrital grain in Morar Group, Moine Nappe; **5** - Friend et al. (2003), U–Pb zircon age of  $1032 \pm 12$  Ma for youngest detrital grain in Morar Group, Moine Nappe; **6** - Peters (2001) – U–Pb zircon age of  $980 \pm 4$  Ma for youngest detrital grain in Morar Group, Moine Nappe; **7** - Kirkland et al. (2008), U–Pb magmatic zircon overgrowth age of  $842 \pm 20$  Ma on detrital Morar Group zircon, Moine Nappe; **8** - Rogers et al. (1998) U–Pb monazite ages of  $827 \pm 2$  and  $781 \pm 1$  Ma for the syn-metamorphic Ardnish and Sgurr Breac pegmatites intrusive into Morar Group; **9** - Vance et al. (1998), Sm–Nd garnet-whole rock ages of  $823 \pm 5$  Ma and  $788 \pm 4$  Ma for growth zones in garnet from the Morar Group; **10** - Tanner and Evans (2003), U–Pb titanite age from calc-silicate pod in Morar Group, Moine Nappe; **11** - Storey et al. (2004), U–Pb titanite age of  $669 \pm 31$  Ma occurring within, and inferred to date, a shear zone between eastern and western units of the Glenelg-Attadale Inlier, which also contains Morar Group rocks; **12** - Burns et al. (2004), Nd depleted mantle model age of around 1000 Ma for the Strathy Complex, possible basement assemblage to the East Sunderland Moine succession in the Naver Nappe; **13** - Kinny and Strachan (unpublished data), U–Pb zircon age of *c.* 965 Ma for protolith to grey granitic gneisses; **14** - Friend et al. (2003), U–Pb zircon age of  $926 \pm 68$  Ma for youngest detrital grain from within the Kirtomy migmatites in East Sunderland Moine succession, Naver Nappe; **15** - Kirkland et al. (2008), U–Pb zircon age of  $1009 \pm 22$  Ma for youngest detrital grain in sample of Glenfinnan Group, Sgurr Beag Nappe; **16** - Cawood et al. (2004), U–Pb zircon age of  $962 \pm 32$  Ma for the average of four analyses from youngest detrital grain in sample of Loch Eil Group, and U–Pb zircon age of  $883 \pm 35$  Ma for the average of two analyses from youngest detrital grain in sample of Glen Urquhart psammite, Sgurr Beag Nappe; **17** - Friend et al. (2003), U–Pb zircon age of  $947 \pm 59$  Ma for youngest detrital grain in sample of granite gneiss incorporating metasediments of the Glenfinnan Group, Sgurr Beag Nappe; **18** - Emery (2005) and Cutts, Kinny, Strachan, Hand, Kelsey, Emery, Friend, & Leslie (unpublished data) U–Pb zircon age of  $917 \pm 13$  Ma for youngest detrital grain from sample of Glenfinnan Group, Sgurr Beag Nappe and U–Pb zircon age of  $725 \pm 4$  Ma and ICP-MS monazite ages of  $825 \pm 18$  Ma,  $782 \pm 11$  Ma and  $724 \pm 6$  Ma for monazite from migmatites within the Glenfinnan Group, Sgurr Beag Nappe; **19** - U–Pb zircon ages of felsic and mafic igneous bodies emplaced into the Glenfinnan and Loch Eil groups of the Sgurr Beag Nappe give ages of  $873 \pm 7$  Ma for the Ardgour Granite Gneiss (Friend et al., 1997),  $873 \pm 6$  Ma for mafic sheets (Millar, 1999), and  $870 \pm 20$  Ma for the Fort Augustus Granite Gneiss (Rogers et al., 2001); **20** - Cawood, Kinny, Strachan and Loewy (unpublished data), U–Pb zircon age on high-U rims of the Glen Doe Granite Gneiss yield an age of *c.* 700 Ma; **21** - Highton et al. (1999), U–Pb zircon ages of  $926 \pm 6$  Ma for youngest detrital grain and  $840 \pm 11$  Ma for melt crystallization and new zircon growth in sample of Dava succession from within Grampian Shear Zone. The succession is part of the sub-Grampian basement to the Dalradian Supergroup and inferred to be an equivalent to the Moine succession (Piasecki, 1980); **22** - Cawood et al. (2003), U–Pb zircon age of  $900 \pm 17$

Ma for youngest detrital grain from sample of Glen Banchor succession, which is part of the sub-Grampian basement to the Dalradian Supergroup and inferred to be an equivalent to the Moine succession; **23** – Noble et al. (1996), U–Pb monazite ages of  $806 \pm 3$  Ma,  $808 +11/-9$  Ma and  $804 +13/-12$  Ma for pegmatites and mylonitic rocks from the Grampian Shear Zone separating sub-Grampian basement and Dalradian Supergroup; **24** – approximate age of 750 Ma based on Rb/Sr ages of muscovites in pegmatites from sub-Grampian basement to the Dalradian Supergroup (Piasecki and van Breemen, 1983, and references therein); **25** – Halliday et al. (1989) and Dempster et al. (2002) have determined U–Pb zircon ages for the Tayvallich Volcanics and inferred comagmatic intrusive rocks of around 600–595 Ma; **26** – Cutts et al. (in press), mean U–Pb zircon age of c. 1030 Ma for youngest grains from sample of Westing Group, Shetland Islands; **27** – Kinny and Strachan (unpublished data), U–Pb zircon age for amphibolites and granites within the Yell Sound Division, Shetland Islands; **28** – Cutts et al. (in press), U–Pb zircon and monazite ages of c. 950–930 Ma determined from the Westing Group, Shetland Islands, and thought to date high-grade metamorphism; **29** – Watt et al. (2000), U–Pb zircon age of  $1072 \pm 21$  Ma for youngest detrital grain from sample of Krummedal succession. East Greenland and  $938 \pm 13$  Ma for undeformed porphyritic granite intruding Stauning Alper migmatite zone (Krummedal succession equivalent); **30** – Kalsbeek et al. (2000), U–Pb zircon ages of  $1012 \pm 17$  Ma and  $994 \pm 30$  Ma for youngest detrital grains from sample of Krummedal succession, which is intruded by anatectic granites at  $947 \pm 19$  Ma,  $942 \pm 20$  Ma,  $939 \pm 21$  Ma,  $935 \pm 9$  Ma,  $927 \pm 65$  Ma,  $921 \pm 8$  Ma,  $919 \pm 14$  Ma; **31** – Strachan et al. (1995), mean U–Pb zircon age of  $955 \pm 13$  Ma for 6 analyses from metasedimentary gneiss (Krummedal succession equivalent) from Smallefjord, NE Greenland, related to high grade metamorphism of gneiss. Youngest detrital grain from sample is  $1029 \pm 17$  Ma; **32** – Leslie and Nutman (2003), U–Pb zircon age of  $915 \pm 18$  Ma for augen granite which cuts folded Krummedal succession metasediments, Renland, East Greenland; **33** – Jensen (1993) Pb–Pb age of  $680 \pm 65$  Ma on Cu ore stratiform deposit within Eleonore Bay Supergroup. An older age for the Eleonore Bay Supergroup is provided by detrital zircons as young as  $987 \pm 18$  Ma (Dhuime et al., 2007) and the presence of acritarchs which are no older than earliest Neoproterozoic according to Vidal (1976); **34** – Balashov et al. (1996), consistent set of U–Pb zircon evaporation ages of  $1160 \pm 40$  Ma for mafic and felsic igneous rocks of the Eimfjellet Group, which separates metasedimentary rocks of the underlying Isbjørnhamma and overlying Deilegga groups, Southwestern terranes, Svalbard; **35** – Pettersson et al. (2009), U–Pb age of  $1131 \pm 18$  Ma for youngest detrital zircon in paragneiss of the Smeerenburgfjorden Complex, a migmatitic equivalent of the Krossfjorden Group, part of the Northwestern terranes of Svalbard, an inferred correlative of the Brennevinsfjorden-Helvetesflya metasedimentary units from the Eastern terranes (NE Svalbard) and the Krummedal sequence of Greenland; **36** – Balashov et al. (1995), U–Pb zircon lower intercept age of c. 930 on volcanic rocks, interpreted as related to regional metamorphism, Southwestern terranes, Svalbard; **37** – Pettersson et al. (2009), U–Pb zircon ages of  $965.8 \pm 10$  Ma,  $958.6 \pm 5$  Ma and  $956.1 \pm 5.6$  Ma for orthogneisses and orthogneiss xenolith in contact with metasedimentary rocks correlated with the Krossfjorden Group, Northwestern terranes of Svalbard; **38** – A.N. Larionov, unpub. data in Johansson et al. (2005), detrital zircon ages as young as  $\sim 1050$  Ma in the Brennevinsfjorden Group, Eastern terranes, Svalbard; **39** – Johansson et al. (2000) Kapp Hansteen Group volcanics (and equivalents) unconformably overlie the Brennevinsfjorden Group and yield U–Pb ages of  $963 \pm 5$  Ma,  $958 \pm 10$  Ma,  $958 \pm 4$  Ma,  $950 \pm 10$  Ma and  $946 \pm 7$  Ma; **40** – augen granites intruding the Brennevinsfjorden and Kapp Hansteen groups yield U–Pb ages in the range  $961 \pm 17$  Ma and  $939 \pm 8$  Ma Group (Gee et al., 1995; see also Johansson et al., 2004; Johansson et al., 2000). **41** – Knoll (1982) has recovered acritarchs from the Murchisonfjorden and Lomfjorden successions suggest an age extending back to the mid-Neoproterozoic (c. 800

Ma); **42** – Kirkland et al. (2007), U–Pb zircon age of  $1027 \pm 16$  Ma for youngest detrital grain from sample of Svaerholt succession, lower nappes of the Kalak Nappe Complex, Norway; **43** – Kirkland et al. (2006), U–Pb zircon age of  $978 \pm 9$  Ma for Hårvika granite, which cuts deformed metasedimentary rocks of the Svaerholt succession, lower nappes of the Kalak Nappe Complex, Norway; **44** – Kirkland et al. (2007), U–Pb zircon age of  $910 \pm 15$  Ma for youngest detrital grain from sample of Sørøy succession, upper nappes of the Kalak Nappe Complex, Norway; **45** – Kirkland et al. (2006), U–Pb zircon age of  $841 \pm 6$  Ma for Litlefjord granite, which cuts deformed metasedimentary rocks of the Sørøy succession, upper nappes of the Kalak Nappe Complex, Norway; **46** – Kirkland et al. (2006), U–Pb zircon age of  $709 \pm 4$  Ma for syn-deformational leucosome in Eidvågeid Paragneiss, upper nappes of the Kalak Nappe Complex, Norway, with deformation related to the Snøfjord event; **47** – Kirkland et al. (2007), U–Pb age of  $672 \pm 6$  Ma for zircon overgrowths in paragneiss from Sørøy succession, upper nappes of the Kalak Nappe Complex, Norway. This is similar to a  $668 \pm 68$  Ma Nd–Sm isochron age for plutons from the Seiland Igneous Province (Daly et al., 1991); **48** – Roberts et al. (2006), U–Pb zircon ages for intrusions of the Seiland Igneous Province, which intrudes the Sørøy succession of the Kalak Nappe Complex, Norway, range from  $571 \pm 4$  Ma to  $562 \pm 6$  Ma; **49** – Pedersen et al. (1989), U–Pb zircon ages of  $531 \pm 2$  Ma and  $523 \pm 2$  Ma for nepheline syenite pegmatite intrusions associated with the latter phases of the Seiland Igneous Province, Norway.

#### Abbreviations:

BH – Brennevinsfjorden Group and Helvetesflya Formation  
 DG – Deilegga Group  
 DS – Dalradian Supergroup  
 EBS – Eleonore Bay Supergroup  
 EG – Eimfjellet Group  
 ES – East Sunderland Moine succession  
 GBD – Glen Banchor and Dava successions, sub-Grampian basement  
 GL – Glenfinnan and Loch Eil Groups, including Glen Urquhart psammite  
 HS – Hinlopenstretet Supergroup  
 IG – Isbjørnhamma Group  
 KfG – Krossfjorden Group  
 KG – Kapp Hansteen Group  
 KLG – Kapp Lyell Group  
 KS – Krummedal succession  
 MG – Morar Group  
 ML – Murchisonfjorden and Lomfjorden successions  
 Pal. - Paleozoic  
 SbG – Sofiebogen Group  
 SC – Strathy Complex  
 SG – Stoer Group  
 SIP – Seiland Igneous Province  
 SIG – Sleat Group  
 SoS – Sørøy succession, Kalak Nappe Complex  
 SvS – Svaerholt succession, Kalak Nappe Complex  
 TG – Torridon Group  
 TIG – Tillite Group  
 YSD – Yell Sound Division – Westing Group

## References

- Balashov, Y.A., Peucat, J.J., Teben'kov, A.M., Ohta, Y., Larionov, A.N., Sirotkin, A.N., and Bjornerud, M., 1996, Rb-Sr whole rock and U-Pb zircon dating of the granitic-gabbroic rocks from the Skålfjellet Subgroup, southwest Spitsbergen: *Polar Research*, v. 15, p. 153-165.
- Balashov, Y.A., Teben'kov, A.M., Ohta, Y., Larionov, A.N., Sirotkin, A.N., Gannibal, L.F., and Ryunginen, G.I., 1995, Grenvillian U-Pb zircon ages of quartz porphyry and rhyolite clasts in a metaconglomerate at Vinsodden, southwestern Spitsbergen: *Polar Research*, v. 14, p. 291-302.
- Burns, I.M., Fowler, M.B., Strachan, R.A., and Greenwood, P.B., 2004, Geochemistry, petrogenesis and structural setting of the meta-igneous Strathy Complex: a unique basement block within the Scottish Caledonides?: *Geological Magazine*, v. 141, p. 209-233.
- Cawood, P.A., Nemchin, A.A., Smith, M., and Loewy, S., 2003, Source of the Dalradian Supergroup constrained by U/Pb dating of detrital zircon and implications for the East Laurentian margin: *Journal of the Geological Society, London*, v. 160, p. 231-246.
- Cawood, P.A., Nemchin, A.A., Strachan, R.A., Kinny, P.D., and Loewy, S., 2004, Laurentian provenance and an intracratonic tectonic setting for the Moine Supergroup, Scotland, constrained by detrital zircons from the Loch Eil and Glen Urquhart successions: *Journal of the Geological Society, London*, v. 161, p. 861-874.
- Cutts, K.A., Hand, M., Kelsey, D.E., Wade, B., Strachan, R.A., Clark, C., and Netting, A., in press, Evidence for 950-930 Ma metamorphism in the Shetland Islands, Scottish Caledonides: implications for early Neoproterozoic tectonics in the Laurentia-Baltica sector of Rodinia: *Journal of the Geological Society, London*.
- Daly, J.S., Aitchison, S.J., Cliff, R.A., Gayer, R.A., and Rice, A.H.N., 1991, Geochronological evidence from discordant plutons for a Late Proterozoic orogen in the Caledonides of Finnmark, northern Norway: *Journal of the Geological Society, London*, v. 148, p. 29-40.
- Dempster, T.J., Rogers, G., Tanner, P.W.G., Bluck, B.J., Muir, R.J., Redwood, S.D., Ireland, T.R., and Paterson, B.A., 2002, Timing of deposition, orogenesis and glaciation within Dalradian rocks of Scotland: constraints from U-Pb zircon ages: *Journal of the Geological Society of London*, v. 159, p. 83-94.
- Dhuime, B., Bosch, D., Bruguier, O., Cabry, R., and Pourtales, S., 2007, Age, provenance and post-deposition metamorphic overprint of detrital zircons from the Nathorst Land group (NE Greenland)--A LA-ICP-MS and SIMS study: *Precambrian Research*, v. 155, p. 24-46.
- Emery, M., 2005, Poly-orogenic history of the Moine rocks of Glen Urquhart, eastern Inverness-shire [PhD thesis], University of Portsmouth.
- Friend, C.R.L., Kinny, P.D., Rogers, G., Strachan, R.A., and Paterson, B.A., 1997, U-Pb zircon geochronological evidence for Neoproterozoic events in the Glenfinnan Group (Moine Supergroup): the formation of the Ardgour granite gneiss, north-west Scotland.: *Contributions to Mineralogy & Petrology*, v. 128, p. 101-113.
- Friend, C.R.L., Strachan, R.A., Kinny, P., and Watt, G.R., 2003, Provenance of the Moine Supergroup of NW Scotland: evidence from geochronology of detrital and inherited zircons from (meta)sedimentary rocks, granites and migmatites: *Journal of the Geological Society, London*, v. 160, p. 247-257.
- Gee, D.G., Johansson, A., Ohta, Y., Tebenkov, A.M., Krasil'schikov, A.A., Balashov, Y.A., Larionov, A.N., Gannibal, L.F., and Ryunginen, G.I., 1995, Grenvillian basement and

- a major unconformity within the Caledonides of Nordaustlandet, Svalbard: *Precambrian Research*, v. 70, p. 215-234.
- Halliday, A.N., Graham, C.M., Aftalion, M., and Dymoke, P., 1989, The deposition age of the Dalradian Supergroup: U-Pb and Sm-Nd isotopic studies of the Tayvallich Volcanics, Scotland: *Journal of the Geological Society, London*, v. 146, p. 3-6.
- Highton, A.J., Hyslop, E.K., and Noble, S.R., 1999, U-Pb zircon geochronology of migmatization in the northern Central Highlands: evidence for pre-Caledonian (Neoproterozoic) tectonometamorphism in the Grampian block, Scotland: *Journal of the Geological Society, London*, v. 156, p. 1195-1204.
- Jensen, S.M., 1993, Lead isotope studies on mineral showings and ore deposits in East Greenland.: *Grønlands geologiske Undersøgelse Rapport*, v. 159, p. 101-108.
- Johansson, A., Gee, D.G., Larionov, A.N., Ohta, Y., and Tebenkov, A.M., 2005, Grenvillian and Caledonian evolution of eastern Svalbard - a tale of two orogenies: *Terra Nova*, v. 17, p. 317-325.
- Johansson, A., Larionov, A.N., Gee, D.G., Ohta, Y., Tebenkov, A.M., and Sandelin, S., 2004, Grenville and Caledonian tectono-magnetic activity in northeasternmost Svalbard, *in* Gee, D.G., and Pease, V.L., eds., *The Neoproterozoic Timanide Orogen of Eastern Baltica*: London, Geological Society, London, Memoirs, 30, p. 207-232.
- Johansson, A., Larionov, A.N., Tebenkov, A.M., Gee, D.G., Whitehouse, M.J., and Vestin, J., 2000, Grenvillian magmatism of western and central Nordaustlandet, northeastern Svalbard: *Transactions of the Royal Society of Edinburgh, Earth Science*, v. 90, p. 221-254.
- Kalsbeek, F., Thrane, K., Nutman, A.P., and Jepsen, H.F., 2000, Late Mesoproterozoic to early Neoproterozoic history of the East Greenland Caledonides: evidence for Grenvillian orogenesis: *Journal of the Geological Society, London*, v. 157, p. 1215-1225.
- Kinnaird, T., Prave, A.R., Kirkland, C.L., Horstwood, M., and Parrish, R.R., 2007, The late Mesoproterozoic - Early Neoproterozoic tectonostratigraphic evolution of Northwest Scotland: The Torridonian revisited: *Journal of the Geological Society, London*, v. 164, p. 541-551.
- Kirkland, C.L., Daly, J.S., and Whitehouse, M.J., 2006, Granitic magmatism of Grenvillian and late Neoproterozoic age in Finnmark, Arctic Norway--Constraining pre-Scandian deformation in the Kalak Nappe Complex: *Precambrian Research*, v. 145, p. 24-52.
- , 2007, Provenance and Terrane Evolution of the Kalak Nappe Complex, Norwegian Caledonides: Implications for Neoproterozoic Paleogeography and Tectonics: *Journal of Geology*, v. 115, p. 21-41.
- Kirkland, C.L., Strachan, R.A., and Prave, A.R., 2008, Detrital zircon signature of the Moine Supergroup, Scotland: Contrasts and comparisons with other Neoproterozoic successions within the circum-North Atlantic region: *Precambrian Research*, v. 163, p. 332-350.
- Knoll, A.H., 1982, Microfossils from the Late Precambrian Dracen Conglomerate, Ny Friesland, Svalbard: *Journal of Paleontology*, v. 56, p. 755-790.
- Leslie, A.G., and Nutman, A.P., 2003, Evidence for Neoproterozoic orogenesis and early high temperature Scandian deformation events in the southern East Greenland Caledonides: *Geological Magazine*, v. 140, p. 309-333.
- Millar, I.L., 1999, Neoproterozoic extensional basic magmatism associated with the West Highland granite gneiss in the Moine Supergroup of NW Scotland: *Journal of the Geological Society of London*, v. 156, p. 1153-1162.
- Noble, S.R., Hyslop, E.K., and Highton, A.J., 1996, High-precision U-Pb monazite geochronology of the c. 806 Ma Grampian Shear Zone and the implications for the

- evolution of the Central Highlands of Scotland: *Journal of the Geological Society*, London, v. 153, p. 511-514.
- Pedersen, R.B., Dunning, G.R., and Robins, B., 1989, U-Pb ages of nepheline syenite pegmatites from the Seiland Magmatic Province, north Norway, *in* Gayer, R.A., ed., *The Caledonide geology of Scandinavia*: London, Graham & Trotman, p. 3-8.
- Peters, D., 2001, Precambrian Terrane Boundary Assessment [PhD thesis], University of Keele.
- Pettersson, C.H., Tebenkov, A.M., Larionov, A.N., Andresen, A.A., and Pease, V., 2009, Timing of migmatization and granite genesis in the Northwestern Terrane of Svalbard, Norway: implications for regional correlations in the Arctic Caledonides: *Journal of the Geological Society*, v. 166, p. 147-158.
- Piasecki, M.A.J., 1980, New light on the Moine rocks of the Central Highlands: *Journal of the Geological Society*, London, v. 137, p. 41-59.
- Piasecki, M.A.J., and van Breemen, O., 1983, Field and isotope evidence for a c.750 Ma tectonothermal event in Moine rocks in the Central Highland region of the Scottish Caledonides: *Transactions of the Royal Society of Edinburgh*, v. 73, p. 119-134.
- Rainbird, R.H., Hamilton, M.A., and Young, G.M., 2001, Detrital zircon geochronology and provenance of the Torridonian, NW Scotland: *Journal of the Geological Society of London*, v. 158, p. 15-27.
- Roberts, R.J., Corfu, F., Torsvik, T.H., Ashwal, L.D., and Ramsay, D.M., 2006, Short-lived mafic magmatism at 570 Ma in the northern Norwegian Caledonides: U/Pb zircon ages from the Seiland Igneous Province: *Geological Magazine*, v. 143, p. 887-903.
- Rogers, G., Hyslop, E.K., Strachan, R.A., Paterson, B.A., and Holdsworth, R.E., 1998, The structural setting and U-Pb chronology of Knoydartian pegmatites in W Inverness-shire: evidence for Neoproterozoic tectonic events in the Moine of NW Scotland: *Journal of the Geological Society*, London, v. 155, p. 685-696.
- Rogers, G., Kinny, P.D., Strachan, R.A., Friend, C.R.L., and Paterson, B.A., 2001, U-Pb geochronology of the Fort Augustus granite gneiss: constraints on the timing of Neoproterozoic and Palaeozoic tectonothermal events in the NW Highlands of Scotland: *Journal of the Geological Society of London*, v. 158, p. 7-14.
- Storey, C.D., Brewer, T.S., and Parrish, R.R., 2004, Late Proterozoic tectonics in northwest Scotland: one contractional orogeny or several: *Precambrian Research*, v. 134, p. 227-247.
- Strachan, R.A., Nutman, A.P., and Friderichsen, J.D., 1995, SHRIMP U-Pb geochronology and metamorphic history of the Smøllefjord sequence, NE Greenland Caledonides.: *Journal of the Geological Society*, London, v. 152, p. 779-784.
- Tanner, P.W.G., and Evans, J.A., 2003, Late Precambrian U-Pb titanite ages for peak regional metamorphism and deformation (Knoydartian orogeny) in the western Moine, Scotland: *Journal of the Geological Society*, London, v. 160, p. 555-564.
- Turnbull, M.J.M., Whitehouse, M.J., and Moorbath, S., 1996, New isotopic age determinations for the Torridonian, NW Scotland: *Journal of the Geological Society*, London, v. 153, p. 955-964.
- Vance, D., Strachan, R.A., and Jones, K.A., 1998, Extensional versus compressional settings for metamorphism: garnet chronometry and pressure-temperature-time histories in the Moine Supergroup, northwest Scotland: *Geology*, v. 26, p. 927-930.
- Vidal, G., 1976, Late Precambrian acritarchs from the Eleonore Bay Group and Tillite Group in East Greenland, *Rapport Grønlands Geologiske Undersøgelse* 78, p. 19.
- Watt, G.R., Kinny, P.D., and Friderichsen, J.D., 2000, U-Pb geochronological of Neoproterozoic and Caledonian tectonothermal events in the East Greenland Caledonides: *Journal of the Geological Society*, London, v. 157, p. 1031-1048.
